# Supplementary material for: Polysaccharide-tackified composite hydrogel for skin-attached sensors
Source: Royal Society of Chemistry journal article supplement (doi:10.1039/d0tc05589a), 2021-01-01
Supplement: d0tc05589a1.pdf [file d0tc05589a1.pdf]

## Supporting information

### **Polysaccharide-tackified composite hydrogel for skin-attached sensors**

Xinyu Zheng, Yang Gao, Xiuyan Ren\*, Guanghui Gao\*

Polymeric and Soft Materials Laboratory, School of Chemical Engineering and Advanced Institute of Materials Science, Changchun University of Technology, Changchun 130012, ChinaAddress here.

Corresponding authors: Xiuyan Ren and Guanghui Gao

E-mail: xyren\_bio@163.com; [ghgao@ccut.edu.cn](mailto:ghgao@ccut.edu.cn)

Table S1 Recipes for GA/rGO/PAAm hydrogels.

| Samples | GA (g) | rGO (g) | AAm (g) | MBA (g) | KPS (g) | TMEDA ( $\mu$ L) | H <sub>2</sub> O (mL) |
|---------|--------|---------|---------|---------|---------|------------------|-----------------------|
| 1       | 0      | 0       | 4       | 0.002   | 0.04    | 35               | 20                    |
| 2       | 0      | 0.3     | 4       | 0.002   | 0.04    | 35               | 20                    |
| 3       | 0.5    | 0.3     | 4       | 0.002   | 0.04    | 35               | 20                    |
| 4       | 1      | 0.3     | 4       | 0.002   | 0.04    | 35               | 20                    |
| 5       | 1.5    | 0.3     | 4       | 0.002   | 0.04    | 35               | 20                    |

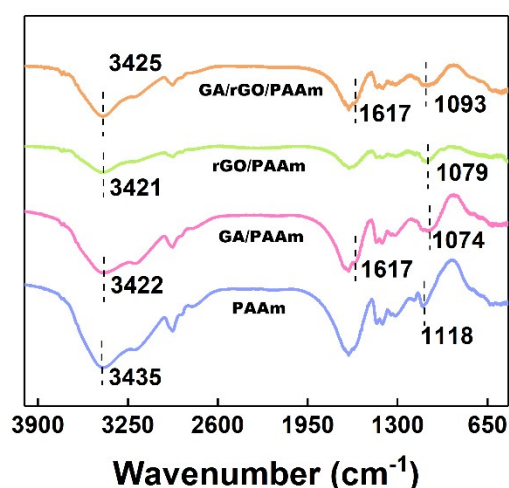

Figure S1 FTIR curves of PAAm hydrogel, GA/PAAm hydrogel, rGO/PAAm hydrogel, and GA/rGO/PAAm hydrogel.

To characterize the physical interactions between GA, rGO, and PAAm, the FTIR curves results for PAAm hydrogel, GA/PAAm hydrogel, rGO/PAAm hydrogel, and GA/rGO/PAAm hydrogel were exhibited in Figure S1. After introducing GA and rGO, it can be found that the overlapping peak due to amino and hydroxyl groups (N–H and O–H stretching vibration absorption peak) for PAAm hydrogels at 3435  $\text{cm}^{-1}$  shifted to 3422  $\text{cm}^{-1}$ , 3421  $\text{cm}^{-1}$ , and 3425  $\text{cm}^{-1}$ , respectively, indicating that –OH of GA and rGO may participate in the reaction. With the introduction of GA, the hydrogels had the stretching vibrational absorption peak of carboxyl groups at 1617  $\text{cm}^{-1}$ . In addition, the stretching vibrational absorption peak of C–O–C at 1118  $\text{cm}^{-1}$  moved to 1074  $\text{cm}^{-1}$ , 1079  $\text{cm}^{-1}$ , and 1093  $\text{cm}^{-1}$ , respectively, further illustrating the GA also participated in the reaction. It is well-known that the formation of intra- or intermolecular H-bonding reduces the force constants of the chemical bonds, therefore their vibrational frequency is shifted to the lower wavenumber.

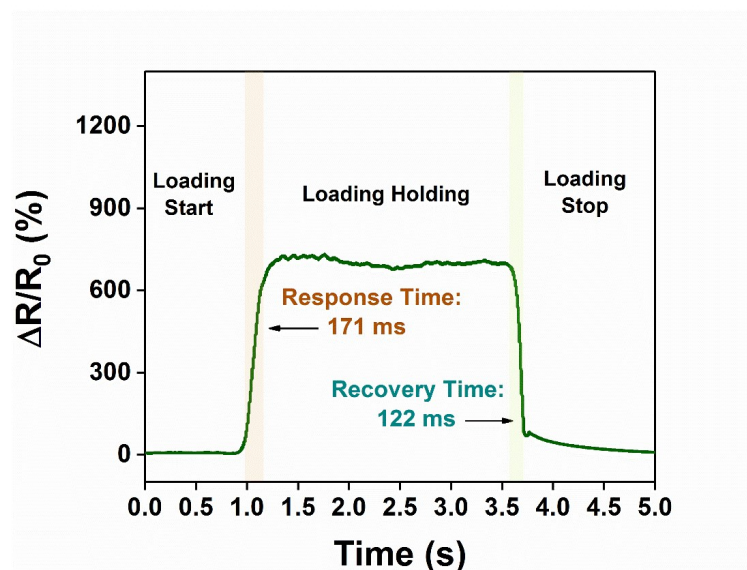

Figure S2 The response time and recovery time of hydrogel strain sensor.

As shown in Figure S2, it exhibited fast response and recovery time of 168 ms and 136 ms. The relevant content has been added in the Supporting Information of the revised manuscript.

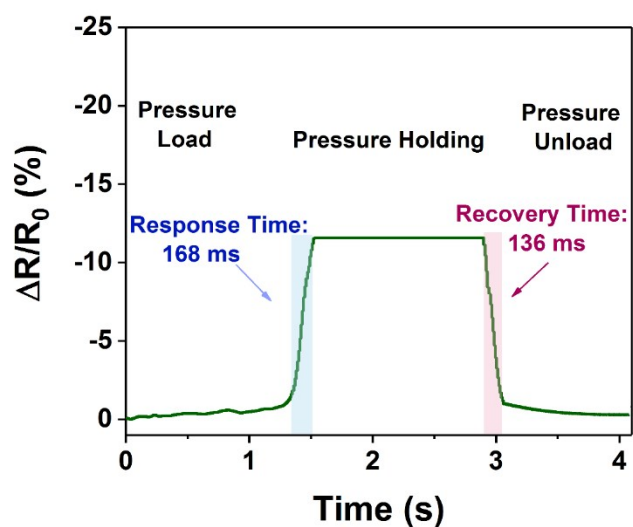

Figure S3 The response time and recovery time of hydrogel pressure sensor.

As shown in Figure S3, the hydrogel pressure sensor showed a rapid response time of 168 ms during pressure loading. At the same time, the pressure hydrogel sensor had a recovery time as short as 136 ms during pressure unloading.

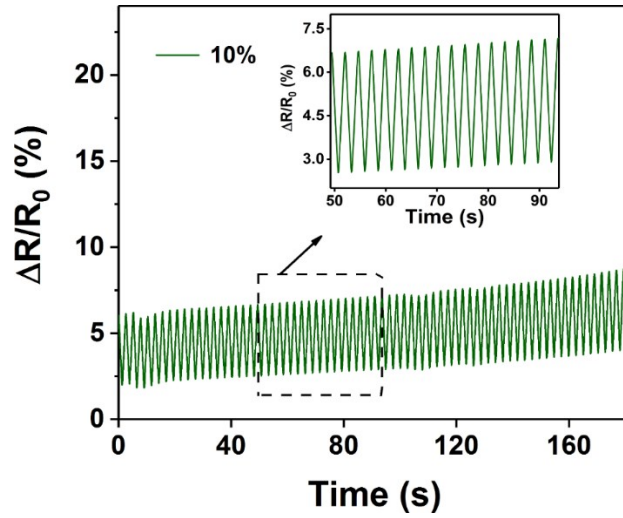

Figure S4 The 70 compressive cycles at maximum pressure of 10 kPa.

The continuous 70 loading-unloading cycles at pressure of 10 kPa were performed, which shown in Figure S4, the resistance change of sensor showed excellent stability and repeatability, which was attributed to the elasticity and rapid recoverability of dynamic cross-linked network of hydrogel.
